# Supplementary material for: Accelerated rates of proton coupled electron transfer to oxygen deficient polyoxovanadate–alkoxide clusters
Source: Royal Society of Chemistry journal article supplement (doi:10.1039/d3qi00129f), 2023-01-01
Supplement: d3qi00129f1.pdf [file d3qi00129f1.pdf]

Electronic Supporting Information  
Accelerated Rates of Proton Coupled Electron Transfer to Oxygen Deficient  
Polyoxovanadate-alkoxide Clusters

Shannon E. Cooney<sup>†</sup>, Eric Schreiber<sup>†</sup>, William W. Brennessel, and Ellen M. Matson\*  
*Department of Chemistry, University of Rochester, Rochester NY 14627 USA*

**Supporting Information Table of Contents:**

|                                                                                                                                                                                                                                                                                                                           |     |
|---------------------------------------------------------------------------------------------------------------------------------------------------------------------------------------------------------------------------------------------------------------------------------------------------------------------------|-----|
| <b>Figure S1.</b> <sup>1</sup> H NMR spectrum of the reaction of [V <sub>6</sub> O <sub>7</sub> ] <sup>0</sup> with two equivalents of 5,10-dihydrophenazine (H <sub>2</sub> Phen) at 294 K in CD <sub>3</sub> CN after 3 minutes.....                                                                                    | S2  |
| <b>Figure S2.</b> <sup>1</sup> H NMR spectrum comparing syntheses for [V <sub>6</sub> O <sub>5</sub> (MeCN) <sub>2</sub> ] <sup>0</sup> at 294 K in CD <sub>3</sub> CN .....                                                                                                                                              | S2  |
| <b>Figure S3.</b> <sup>1</sup> H NMR spectrum of [V <sub>6</sub> O <sub>7</sub> ] <sup>0</sup> with one equivalent of hydrazobenzene (Hydz) at 294 K in THF-d <sub>8</sub> .....                                                                                                                                          | S3  |
| <b>Figure S4.</b> <sup>1</sup> H NMR spectra of [V <sub>6</sub> O <sub>6</sub> (MeCN)] <sup>0</sup> (blue, bottom) and [V <sub>6</sub> O <sub>6</sub> (OH <sub>2</sub> )] <sup>0</sup> (purple, top) at 294 K in THF-d <sub>8</sub> .....                                                                                 | S3  |
| <b>Table S1.</b> Crystallographic parameters of the molecular structure obtained for complex [V <sub>6</sub> O <sub>6</sub> (OH <sub>2</sub> )] <sup>0</sup> .THF <sub>2</sub> .....                                                                                                                                      | S4  |
| <b>Table S2.</b> Bond valence sum calculations on the V ions of [V <sub>6</sub> O <sub>6</sub> (OH <sub>2</sub> )] <sup>0</sup> .....                                                                                                                                                                                     | S4  |
| <b>Figure S5.</b> Electronic absorption spectrum of [V <sub>6</sub> O <sub>6</sub> (OH <sub>2</sub> )] <sup>0</sup> recorded at 294 K in THF .....                                                                                                                                                                        | S5  |
| <b>Figure S6.</b> <sup>1</sup> H NMR spectra of reactions of 1,4-dihydroxynaphthalene (H <sub>2</sub> Naphth) with [V <sub>6</sub> O <sub>7</sub> ] <sup>0</sup> at various reductant:cluster ratios for 7 days recorded in THF-d <sub>8</sub> at 294 K .....                                                             | S5  |
| <b>Figure S7.</b> <sup>1</sup> H NMR spectrum of the reaction of [V <sub>6</sub> O <sub>7</sub> ] <sup>0</sup> with one equivalent of H <sub>2</sub> Naphth at 294 K in THF-d <sub>8</sub> .....                                                                                                                          | S6  |
| <b>Table S3.</b> BDFE <sub>adj</sub> calculated from equilibrium reactions described in Figure S6 .....                                                                                                                                                                                                                   | S7  |
| <b>Figure S8.</b> <sup>1</sup> H NMR spectrum of [V <sub>6</sub> O <sub>5</sub> (OH <sub>2</sub> )(MeCN)] <sup>0</sup> at 294 K in THF-d <sub>8</sub> .....                                                                                                                                                               | S8  |
| <b>Figure S9.</b> <sup>1</sup> H NMR spectra of the reaction of Hydz with one equivalent of [V <sub>6</sub> O <sub>6</sub> (MeCN)] <sup>0</sup> at 294 K after 5 min and 1 day recorded in THF-d <sub>8</sub> at 294 K .....                                                                                              | S8  |
| <b>Figure S10.</b> <sup>1</sup> H NMR spectra of reactions of Hydz with one equivalent of [V <sub>6</sub> O <sub>6</sub> (MeCN)] <sup>0</sup> at 294 K , diamagnetic region, trial A-C recorded in THF-d <sub>8</sub> .....                                                                                               | S9  |
| <b>Table S4.</b> BDFE <sub>adj</sub> of calculated from equilibrium reactions described in Figure S9.....                                                                                                                                                                                                                 | S9  |
| <b>Figure S11.</b> CV of 2 mM H <sub>2</sub> Phen (purple) and Phen (orange) in THF .....                                                                                                                                                                                                                                 | S9  |
| <b>Figure S12.</b> CV of 1 mM [V <sub>6</sub> O <sub>7</sub> ] <sup>0</sup> (green), [V <sub>6</sub> O <sub>6</sub> (MeCN)] <sup>0</sup> (purple), [V <sub>6</sub> O <sub>6</sub> (OH <sub>2</sub> )] <sup>0</sup> (orange), and [V <sub>6</sub> O <sub>5</sub> (MeCN)(OH <sub>2</sub> )] <sup>0</sup> (red) in THF ..... | S10 |
| <b>Table S5.</b> Redox potentials of [V <sub>6</sub> O <sub>7</sub> ] <sup>0</sup> , [V <sub>6</sub> O <sub>6</sub> (MeCN)] <sup>0</sup> , [V <sub>6</sub> O <sub>6</sub> (OH <sub>2</sub> )] <sup>0</sup> , [V <sub>6</sub> O <sub>5</sub> (MeCN)(OH <sub>2</sub> )] <sup>0</sup> , Phen, and H <sub>2</sub> Phen .....  | S10 |
| <b>Table S6.</b> Determination of the average pK <sub>a</sub> 's of H <sub>2</sub> Phen, “[V <sub>6</sub> O <sub>6</sub> (OH <sub>2</sub> )] <sup>2+</sup> ”, and “[V <sub>6</sub> O <sub>5</sub> (MeCN)(OH <sub>2</sub> )] <sup>2+</sup> ” in THF using the Bordwell Equation .....                                      | S11 |
| <b>Figure S13.</b> Electronic absorption spectrum of [V <sub>6</sub> O <sub>5</sub> (OH <sub>2</sub> )(MeCN)] <sup>0</sup> , grey dotted trace and [V <sub>6</sub> O <sub>5</sub> (MeCN) <sub>2</sub> ] <sup>0</sup> , red trace, recorded at 21 °C in THF .....                                                          | S11 |
| <b>Figure S14.</b> UV-Vis NIR of [V <sub>6</sub> O <sub>6</sub> (MeCN)] <sup>0</sup> + 1 eq H <sub>2</sub> Phen over time at 238 K in MeCN .....                                                                                                                                                                          | S12 |
| <b>Figure S15.</b> Plot of absorbance at 900 nm over time for [V <sub>6</sub> O <sub>6</sub> (MeCN)] <sup>0</sup> (0.75 mM) and H <sub>2</sub> Phen (3.8 mM) under pseudo-first order conditions in CH <sub>3</sub> CN at 258 K .....                                                                                     | S12 |
| <b>Figure S16.</b> Plot of absorbance at 900 nm over time for [V <sub>6</sub> O <sub>6</sub> (MeCN)] <sup>0</sup> (0.75 mM) and H <sub>2</sub> Phen (5.0 mM) under pseudo-first order conditions in CH <sub>3</sub> CN at 258 K .....                                                                                     | S13 |
| <b>Figure S17.</b> Plot of absorbance at 900 nm over time for [V <sub>6</sub> O <sub>6</sub> (MeCN)] <sup>0</sup> (0.75 mM) and H <sub>2</sub> Phen (6.4 mM) under pseudo-first order conditions in CH <sub>3</sub> CN at 258 K .....                                                                                     | S13 |
| <b>Figure S18.</b> Plot of absorbance at 900 nm over time for [V <sub>6</sub> O <sub>6</sub> (MeCN)] <sup>0</sup> (0.75 mM) and H <sub>2</sub> Phen (7.5 mM) under pseudo-first order conditions in CH <sub>3</sub> CN at 258 K .....                                                                                     | S14 |
| <b>Figure S19.</b> Plot of absorbance at 900 nm over time for [V <sub>6</sub> O <sub>6</sub> (MeCN)] <sup>0</sup> (0.75 mM) and H <sub>2</sub> Phen (8.9 mM) under pseudo-first order conditions in CH <sub>3</sub> CN at 258 K .....                                                                                     | S14 |
| <b>Figure S20.</b> Plots of absorbance at 900 nm over time for [V <sub>6</sub> O <sub>6</sub> (MeCN)] <sup>0</sup> (0.75 mM) and D <sub>2</sub> Phen (3.75 mM) under pseudo-first order conditions in CH <sub>3</sub> CN at 258 K.....                                                                                    | S15 |
| <b>Figure S21.</b> Plots of absorbance at 900 nm over time for [V <sub>6</sub> O <sub>6</sub> (MeCN)] <sup>0</sup> (0.75 mM) and D <sub>2</sub> Phen (4.73 mM) under pseudo-first order conditions in CH <sub>3</sub> CN at 258 K.....                                                                                    | S15 |
| <b>Figure S22.</b> Plots of absorbance at 900 nm over time for [V <sub>6</sub> O <sub>6</sub> (MeCN)] <sup>0</sup> (0.75 mM) and D <sub>2</sub> Phen (6.04 mM) under pseudo-first order conditions in CH <sub>3</sub> CN at 258 K.....                                                                                    | S16 |
| <b>Figure S23.</b> Plots of absorbance at 900 nm over time for [V <sub>6</sub> O <sub>6</sub> (MeCN)] <sup>0</sup> (0.75 mM) and D <sub>2</sub> Phen (9.06 mM) under pseudo-first order conditions in CH <sub>3</sub> CN at 258 K.....                                                                                    | S16 |
| <b>Figure S24.</b> Plots of absorbance at 900 nm over time for [V <sub>6</sub> O <sub>6</sub> (MeCN)] <sup>0</sup> (0.75 mM) and D <sub>2</sub> Phen (10.1 mM) under pseudo-first order conditions in CH <sub>3</sub> CN at 258 K.....                                                                                    | S16 |
| <b>Figure S25.</b> Plots of absorbance at 900 nm over time for [V <sub>6</sub> O <sub>6</sub> (MeCN)] <sup>0</sup> (0.75 mM) and H <sub>2</sub> Phen (7.26 mM) in CH <sub>3</sub> CN at 288 K .....                                                                                                                       | S17 |
| <b>Figure S26.</b> Plots of absorbance at 900 nm over time for [V <sub>6</sub> O <sub>6</sub> (MeCN)] <sup>0</sup> (0.75 mM) and H <sub>2</sub> Phen (7.26 mM) in CH <sub>3</sub> CN at 268 K .....                                                                                                                       | S17 |
| <b>Figure S27.</b> Plots of absorbance at 900 nm over time for [V <sub>6</sub> O <sub>6</sub> (MeCN)] <sup>0</sup> (0.75 mM) and H <sub>2</sub> Phen (7.26 mM) in CH <sub>3</sub> CN at 248 K .....                                                                                                                       | S17 |
| <b>Figure S28.</b> Plots of absorbance at 900 nm over time for [V <sub>6</sub> O <sub>6</sub> (MeCN)] <sup>0</sup> (0.75 mM) and H <sub>2</sub> Phen (7.26 mM) in CH <sub>3</sub> CN at 238 K .....                                                                                                                       | S18 |
| <b>Figure S29.</b> Plot of [V <sub>6</sub> O <sub>6</sub> (MeCN)] <sup>0</sup> + H <sub>2</sub> Phen at 258 K at 900 nm over time, second order experiment conditions .....                                                                                                                                               | S18 |
| <b>References</b> .....                                                                                                                                                                                                                                                                                                   | S19 |

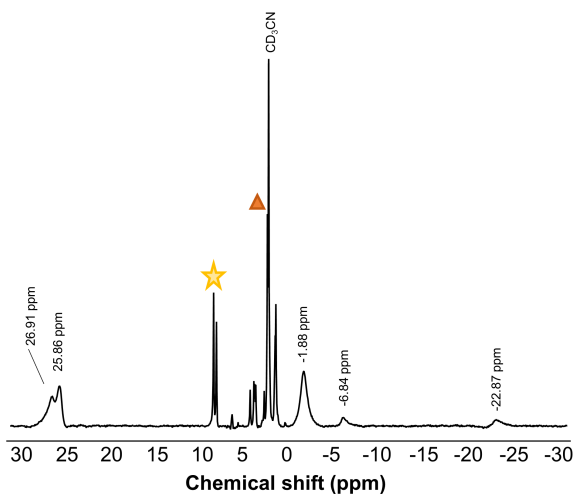

**Figure S1.**  $^1\text{H}$  NMR spectrum of the reaction of  $[\text{V}_6\text{O}_7]^0$  with two equivalents of 5,10-dihydrophenazine ( $\text{H}_2\text{Phen}$ ) at 294 K in  $\text{CD}_3\text{CN}$  after 3 minutes. Orange triangle represent  $\text{H}_2\text{O}$  (2.13 in  $\text{CD}_3\text{CN}$ ) product and yellow star denotes phenazine.

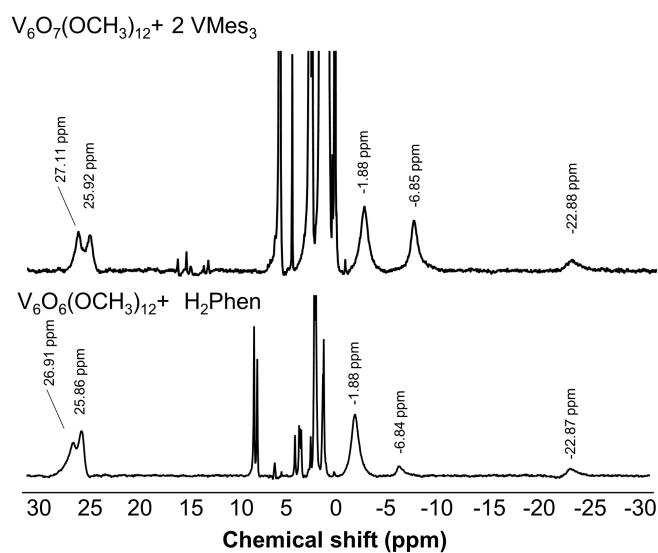

**Figure S2.**  $^1\text{H}$  NMR spectrum of  $[\text{V}_6\text{O}_7]^0 + 2$  equivalents of  $\text{VMes}_3(\text{THF})$  (2019, top)<sup>1</sup> and the synthesis of  $[\text{V}_6\text{O}_5(\text{MeCN})_2]^0$  using 2 equivalents of HAT reagent ( $\text{H}_2\text{Phen}$ ) (2023, bottom) at 294 K in  $\text{CD}_3\text{CN}$ .

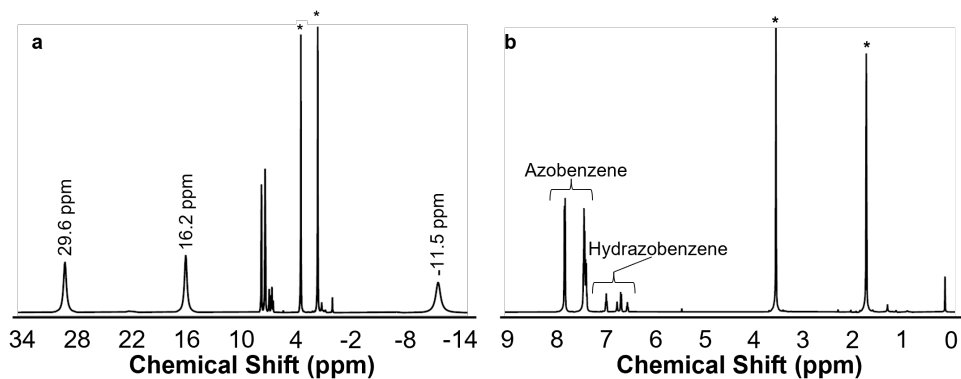

**Figure S3.**  $^1\text{H}$  NMR spectrum of the reaction of  $[\text{V}_6\text{O}_7]^0$  with one equivalent of hydrazobenzene (Hydz) at 294 K in  $\text{THF-d}_8$ , a- paramagnetic region showing the three peaks associated with  $[\text{V}_6\text{O}_6(\text{OH}_2)]^0$ , b- diamagnetic region showing the formation of azobenzene and residual hydrazobenzene. Notable in this crude reaction mixture is the lack of formation of  $\text{H}_2\text{O}$ , indicating it remains bound to the cluster.

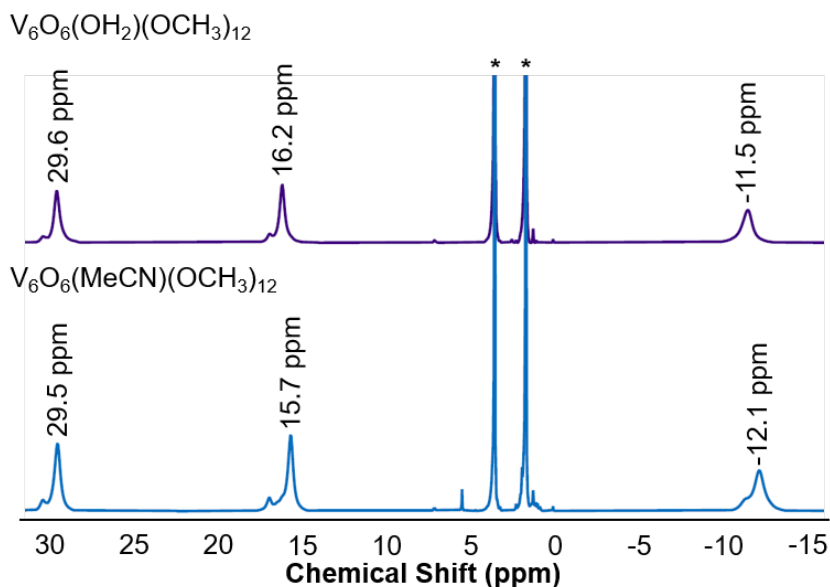

**Figure S4.**  $^1\text{H}$  NMR spectra of  $[\text{V}_6\text{O}_6(\text{MeCN})]^0$  (blue, bottom) and  $[\text{V}_6\text{O}_6(\text{OH}_2)]^0$  (purple, top) at 294 K in  $\text{THF-d}_8$ .

**Table S1.** Crystallographic parameters of the molecular structure obtained for complex  $[\text{V}_6\text{O}_6(\text{OH}_2)] \cdot \text{THF}_2$ .

|                                                |                                                                                                                                                                                           |
|------------------------------------------------|-------------------------------------------------------------------------------------------------------------------------------------------------------------------------------------------|
| Compound                                       | $[\text{V}_6\text{O}_6(\text{OH}_2)] \cdot \text{THF}_2$                                                                                                                                  |
| Empirical formula                              | $\text{C}_{20}\text{H}_{54}\text{O}_{21}\text{V}_6$                                                                                                                                       |
| Formula weight                                 | 936.27                                                                                                                                                                                    |
| Temperature / K                                | 100.00(10)                                                                                                                                                                                |
| Wavelength / Å                                 | 1.54184                                                                                                                                                                                   |
| Crystal group                                  | Triclinic                                                                                                                                                                                 |
| Space group                                    | <i>P</i> -1                                                                                                                                                                               |
| Unit cell dimensions                           | $a = 92190(2) \text{ \AA}$<br>$b = 10.6059(2) \text{ \AA}$<br>$c = 18.4535(2) \text{ \AA}$<br>$\alpha = 96.3890(10)^\circ$<br>$\beta = 90.1810(10)^\circ$<br>$\gamma = 91.4940(10)^\circ$ |
| Volume / Å <sup>3</sup>                        | 1792.46(6)                                                                                                                                                                                |
| Z                                              | 2                                                                                                                                                                                         |
| Reflections collected                          | 54875                                                                                                                                                                                     |
| Independent reflections                        | 7646                                                                                                                                                                                      |
| Completeness (theta)                           | 99.4% (74.504°)                                                                                                                                                                           |
| Goodness-of-fit on $F^2$                       | 1.117                                                                                                                                                                                     |
| Final <i>R</i> indices<br>[ $I > 2\sigma(I)$ ] | $R1 = 0.0360$                                                                                                                                                                             |
| Largest diff. peak and hole                    | 0.535 and -0.490 e.Å <sup>-3</sup>                                                                                                                                                        |

**Table S2.** Bond valence sum calculations on the V ions of  $[\text{V}_6\text{O}_6(\text{OH}_2)]^0$ .

| Oxidation State  | V1 <sup>a</sup> | V2           | V3           | V4           | V5           | V6           |
|------------------|-----------------|--------------|--------------|--------------|--------------|--------------|
| V <sup>III</sup> | <b>3.067</b>    | 3.885        | 3.936        | 3.909        | 3.939        | 4.421        |
| V <sup>IV</sup>  | 3.141           | <b>3.978</b> | <b>4.030</b> | <b>4.002</b> | <b>4.033</b> | 4.526        |
| V <sup>V</sup>   | 3.376           | 4.242        | 4.297        | 4.267        | 4.299        | <b>4.820</b> |

<sup>a</sup>V1 bears a terminal aquo ligand

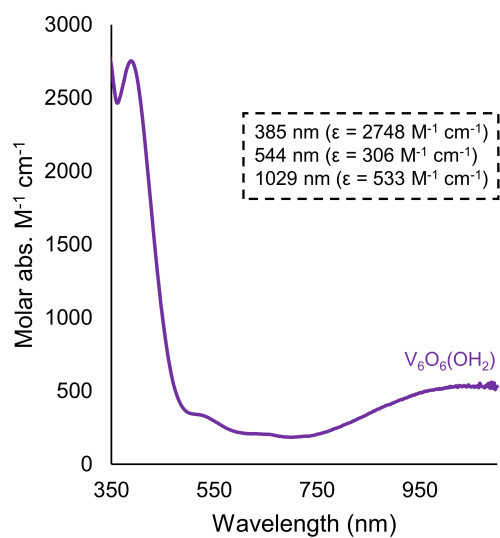

**Figure S5.** Electronic absorption spectrum of  $[\text{V}_6\text{O}_6(\text{OH}_2)]^0$  recorded at 294 K in THF, bands are labeled in figure inset.

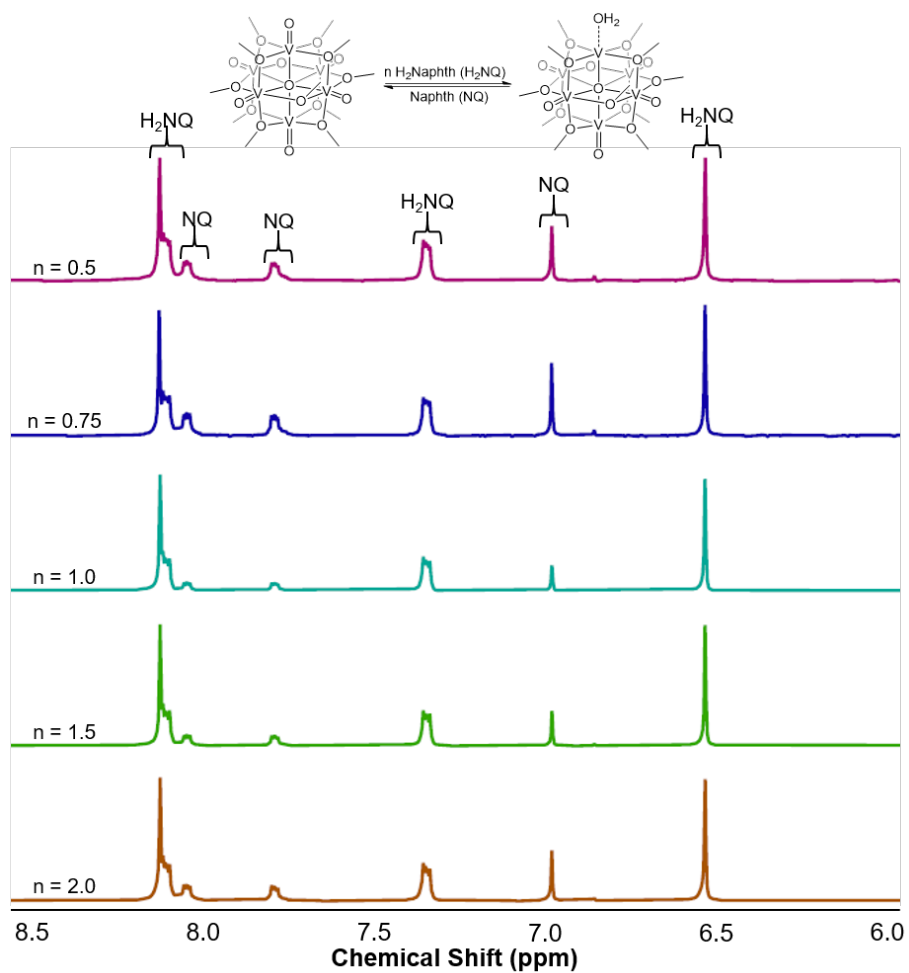

**Figure S6.**  $^1\text{H}$  NMR spectra of reactions of 1,4-dihydroxynaphthalene ( $\text{H}_2\text{Naphth}$ ) with  $[\text{V}_6\text{O}_7]^0$  at various reductant:cluster ratios at 21 °C for 7 days recorded in  $\text{THF-d}_8$  at 294 K.

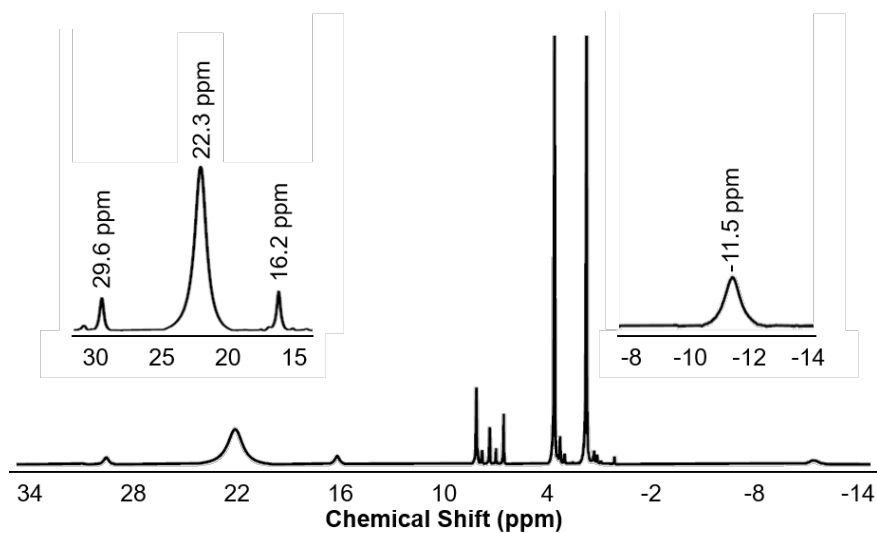

**Figure S7.** <sup>1</sup>H NMR spectrum of the reaction of  $[\text{V}_6\text{O}_7]^0$  with one equivalent of  $\text{H}_2\text{Naphth}$  at 294 K after 7 days in  $\text{THF-d}_8$ .

**Table S3.** BDFE<sub>adj</sub> calculated for  $[\text{V}_6\text{O}_6(\text{OH})_2]^{0-}$  from equilibrium reactions described in Figure S6, using the equation outlined in the Experimental section in the main text.

| n                                                                                                                                                                                             | 1,4-Dihydroxynaphthalene |                    |               |                    |               |                    | Naphthoquinone |               |                    |               |                    |               | BDFE <sub>adj</sub><br>(kcal/mol) |               |                    |
|-----------------------------------------------------------------------------------------------------------------------------------------------------------------------------------------------|--------------------------|--------------------|---------------|--------------------|---------------|--------------------|----------------|---------------|--------------------|---------------|--------------------|---------------|-----------------------------------|---------------|--------------------|
|                                                                                                                                                                                               | 8.1 ppm (4 H)            |                    | 7.3 ppm (2 H) |                    | 6.5 ppm (2 H) |                    | Avg.<br>Conc.  | 8.0 ppm (2 H) |                    | 7.8 ppm (2 H) |                    | 7.0 ppm (2 H) |                                   | Avg.<br>Conc. |                    |
|                                                                                                                                                                                               | Integral                 | Conc. <sup>a</sup> | Integral      | Conc. <sup>a</sup> | Integral      | Conc. <sup>a</sup> |                | Integral      | Conc. <sup>a</sup> | Integral      | Conc. <sup>a</sup> | Integral      |                                   |               | Conc. <sup>a</sup> |
| 0.5                                                                                                                                                                                           | 3.47                     | 0.87               | 1.76          | 0.88               | 1.70          | 0.85               | <b>0.87</b>    | 1.07          | 0.54               | 0.91          | 0.46               | 0.84          | 0.42                              | <b>0.47</b>   |                    |
| 0.75                                                                                                                                                                                          | 4.40                     | 1.10               | 2.17          | 1.09               | 2.15          | 1.08               | <b>1.09</b>    | 1.12          | 0.56               | 1.00          | 0.5                | 0.86          | 0.43                              | <b>0.50</b>   |                    |
| 1.0                                                                                                                                                                                           | 4.92                     | 1.23               | 2.46          | 1.23               | 2.48          | 1.24               | <b>1.23</b>    | 1.16          | 0.58               | 1.00          | 0.5                | 0.91          | 0.46                              | <b>0.51</b>   |                    |
| 1.5                                                                                                                                                                                           | 7.03                     | 1.76               | 3.48          | 1.74               | 3.47          | 1.74               | <b>1.74</b>    | 1.05          | 0.53               | 1.00          | 0.5                | 0.87          | 0.44                              | <b>0.49</b>   |                    |
| 2.0                                                                                                                                                                                           | 8.61                     | 2.15               | 4.30          | 2.15               | 4.29          | 2.15               | <b>2.15</b>    | 1.05          | .525               | 1.00          | 0.5                | 0.88          | 0.44                              | <b>0.49</b>   |                    |
| <sup>a</sup> Relative concentration of either 1,4-dihydroxynaphthalene or naphthoquinone was determined by dividing the integral by the number of protons a given signal(s) corresponds with. |                          |                    |               |                    |               |                    |                |               |                    |               |                    |               |                                   |               |                    |
| Avg.                                                                                                                                                                                          |                          |                    |               |                    |               |                    |                |               |                    |               |                    |               |                                   |               |                    |
| Std. Dev.                                                                                                                                                                                     |                          |                    |               |                    |               |                    |                |               |                    |               |                    |               |                                   |               |                    |
| <b>62.3</b>                                                                                                                                                                                   |                          |                    |               |                    |               |                    |                |               |                    |               |                    |               |                                   |               |                    |
| <b>0.1</b>                                                                                                                                                                                    |                          |                    |               |                    |               |                    |                |               |                    |               |                    |               |                                   |               |                    |

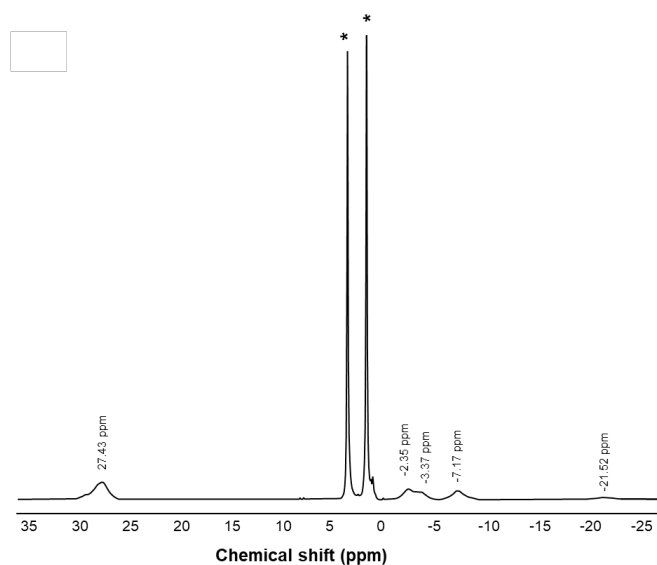

**Figure S8.**  $^1\text{H}$  NMR spectrum of  $[\text{V}_6\text{O}_5(\text{OH}_2)(\text{MeCN})]^{0}$  at 294 K in  $\text{THF-d}_8$  (indicated by asterisks).

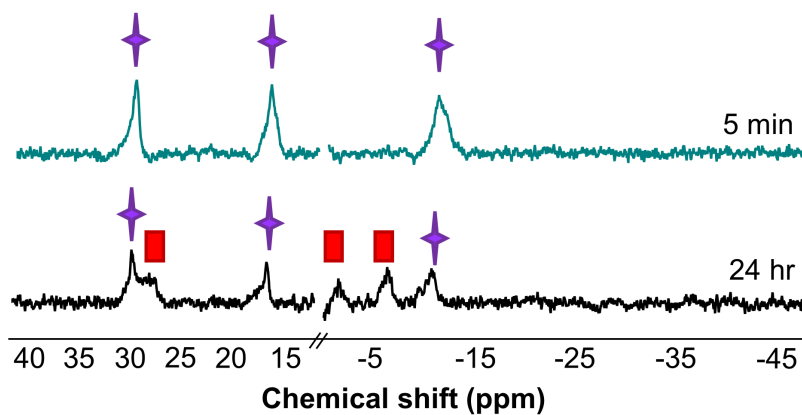

**Figure S9.**  $^1\text{H}$  NMR spectra in the paramagnetic region of reaction of Hydrazine with one equivalent of  $[\text{V}_6\text{O}_6(\text{MeCN})]^{0}$  at  $21^\circ\text{C}$  for after 5 min (top, teal) and 1 day (bottom, black) recorded in  $\text{THF-d}_8$  at 294 K. Purple stars indicate starting material  $[\text{V}_6\text{O}_6(\text{MeCN})]^{0}$  and red squares indicate the formation of  $[\text{V}_6\text{O}_5(\text{MeCN})(\text{OH}_2)]^{0}$ .



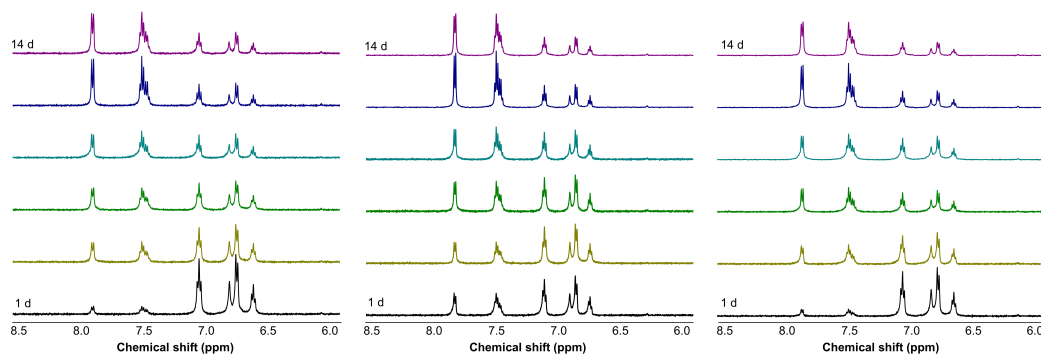

**Figure S10.**  $^1\text{H}$  NMR spectra in the diamagnetic region of reaction of Hydrazobenzene with one equivalent of  $[\text{V}_6\text{O}_6(\text{MeCN})]^{0}$  at 294 K, over 14 days in  $\text{THF-d}_8$ , trial A-C (left to right). Growth of oxidized organic reagent (Azo) is seen at 7.5 and 7.9 ppm.

**Table S4.**  $\text{BDFE}_{\text{adj}}$  calculated for  $[\text{V}_6\text{O}_5(\text{MeCN})(\text{OH}_2)]^{0}$  from equilibrium reactions described in Figure S9, using the equation outlined in the Experimental section in the main text.

| Trial | Hydrazobenzene |                             |                |                             |               | Azobenzene <sup>b</sup> |                             |                |                             |               | $\text{BDFE}_{\text{adj}}$<br>(kcal/mol) |      |
|-------|----------------|-----------------------------|----------------|-----------------------------|---------------|-------------------------|-----------------------------|----------------|-----------------------------|---------------|------------------------------------------|------|
|       | 7.06 ppm (4 H) |                             | 6.77 ppm (6 H) |                             | Avg.<br>Conc. | 7.92 ppm (4 H)          |                             | 7.52 ppm (6 H) |                             | Avg.<br>Conc. |                                          |      |
|       | Integral       | Relative Conc. <sup>a</sup> | Integral       | Relative Conc. <sup>a</sup> |               | Integral                | Relative Conc. <sup>a</sup> | Integral       | Relative Conc. <sup>a</sup> |               |                                          |      |
| A     | 0.52           | 0.13                        | 0.70           | 0.116                       | 0.125         | 1                       | 0.25                        | 1.55           | 0.258                       | 0.254         | 60.6                                     |      |
| B     | 0.50           | 0.125                       | 0.63           | 0.105                       | 0.115         | 1                       | 0.25                        | 1.55           | 0.258                       | 0.254         | 60.7                                     |      |
| C     | 0.45           | 0.113                       | 0.54           | 0.09                        | 0.102         | 1                       | 0.25                        | 1.58           | 0.263                       | 0.256         | 60.7                                     |      |
|       |                |                             |                |                             |               |                         |                             |                |                             |               | Avg.                                     | 60.7 |
|       |                |                             |                |                             |               |                         |                             |                |                             |               | Std. Dev.                                | 0.1  |

<sup>a</sup> Relative concentration of either hydrazobenzene or azobenzene was determined by dividing the integral by the number of protons a given signal(s) corresponds with.

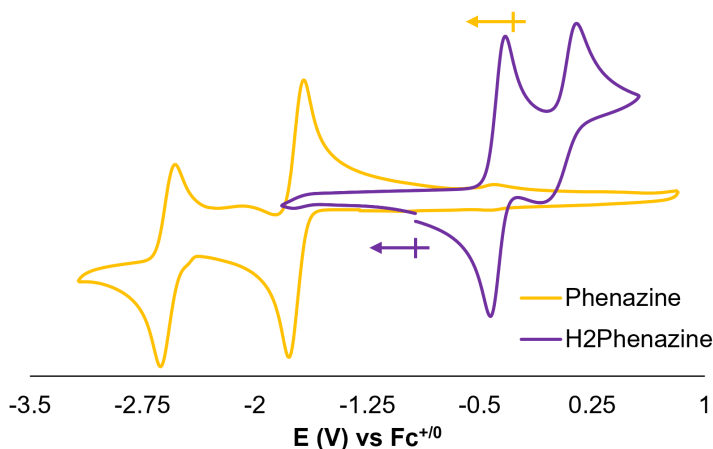

**Figure S11.** CV of 2 mM  $\text{H}_2\text{Phen}$  (purple) and  $\text{Phen}$  (orange) collected at  $100 \text{ mVs}^{-1}$  in  $\text{THF}$  with 200 mM  $[\text{nBu}_4\text{N}][\text{PF}_6]$  supporting electrolyte.

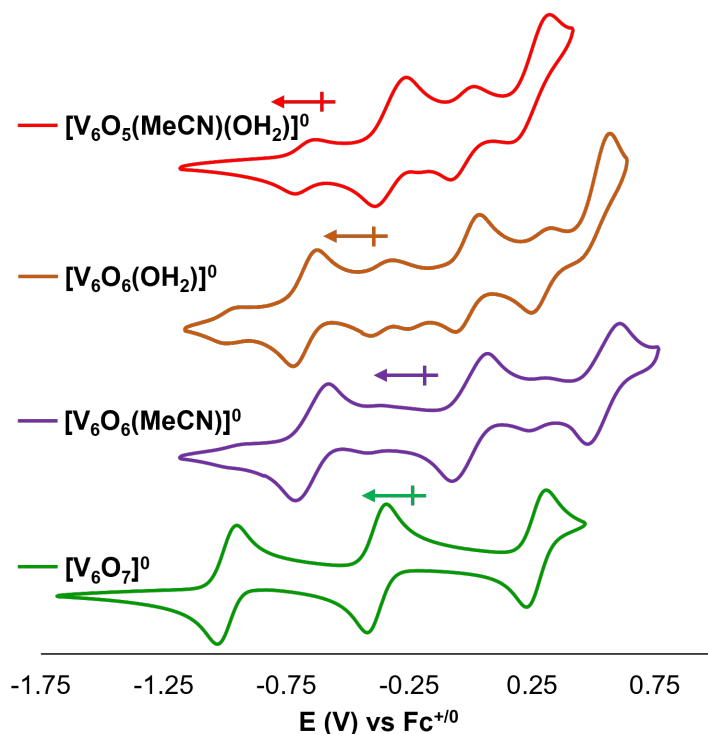

**Figure S12.** CV of 1 mM  $[\text{V}_6\text{O}_7]^0$  (green),  $[\text{V}_6\text{O}_6(\text{MeCN})]^0$  (purple),  $[\text{V}_6\text{O}_6(\text{OH}_2)]^0$  (orange), and  $[\text{V}_6\text{O}_5(\text{MeCN})(\text{OH}_2)]^0$  (red) collected at  $100 \text{ mVs}^{-1}$  in THF with 200 mM  $[\text{nBu}_4\text{N}][\text{PF}_6]$  supporting electrolyte versus  $\text{Fc}^{+/0}$ . Due to electrochemical instability of the O-atom deficient species, some features of the corresponding oxidized complex are observed on the CV timescale.

**Table S5.** Redox potentials of  $[\text{V}_6\text{O}_7]^0$ ,  $[\text{V}_6\text{O}_6(\text{MeCN})]^0$ ,  $[\text{V}_6\text{O}_6(\text{OH}_2)]^0$ ,  $[\text{V}_6\text{O}_5(\text{MeCN})(\text{OH}_2)]^0$ , Phen, and  $\text{H}_2\text{Phen}$  from CVs in Figure S12 (vs  $\text{Fc}^{+/0}$ ). The position of the open circuit voltage is denoted by the red border lines

| $[\text{V}_6\text{O}_7]^0$ | $[\text{V}_6\text{O}_6(\text{MeCN})]^0$ | $[\text{V}_6\text{O}_6(\text{OH}_2)]^0$ | $[\text{V}_6\text{O}_5(\text{MeCN})(\text{OH}_2)]^0$ | Phen  | $\text{H}_2\text{Phen}$ |
|----------------------------|-----------------------------------------|-----------------------------------------|------------------------------------------------------|-------|-------------------------|
| -0.994                     | -0.646                                  | -0.674                                  | -0.325                                               | -2.57 | -0.387                  |
| -0.385                     | -0.0197                                 | -0.0231                                 | 0.222                                                | -1.72 | 0.0240                  |
| 0.267                      | 0.523                                   | 0.467                                   | -                                                    | -     | -                       |

**Table S6.** Determination of the average  $pK_a$ 's of  $H_2Phen$ , “[ $V_6O_6(OH_2)$ ] $^{2+}$ ”, and “[ $V_6O_5(MeCN)(OH_2)$ ] $^{2+}$ ” in THF using the Bordwell Equation.

| Compound                            | BDFE<br>(kcal mol $^{-1}$ ) | $E^0$ <sup>a</sup><br>(V, vs $Fc^{+/0}$ ) | $E^0$ (avg)<br>(V, vs $Fc^{+/0}$ ) | $C_G$<br>(kcal mol $^{-1}$ ) | $pK_a$ |
|-------------------------------------|-----------------------------|-------------------------------------------|------------------------------------|------------------------------|--------|
| $H_2Phen$                           | 59.2                        | -1.72,<br>-2.57                           | -2.15                              | 59.9                         | 35.6   |
| “[ $V_6O_5(MeCN)(OH_2)$ ] $^{2+}$ ” | 60.7                        | -0.646,<br>-0.0197                        | -0.0514                            | 59.9                         | 1.45   |
| “[ $V_6O_6(OH_2)$ ] $^{2+}$ ”       | 62.3                        | -0.0231,<br>0.467                         | 0.222                              | 59.9                         | -1.98  |

<sup>a</sup>  $1e^-$  redox potentials of respective species. For  $H_2Phen$ , the reduction events of  $Phen$  were used. For cluster species, the oxidation potentials of the [ $V_6O_5(MeCN)(OH_2)$ ] $^0$  and [ $V_6O_6(OH_2)$ ] $^0$  were used.

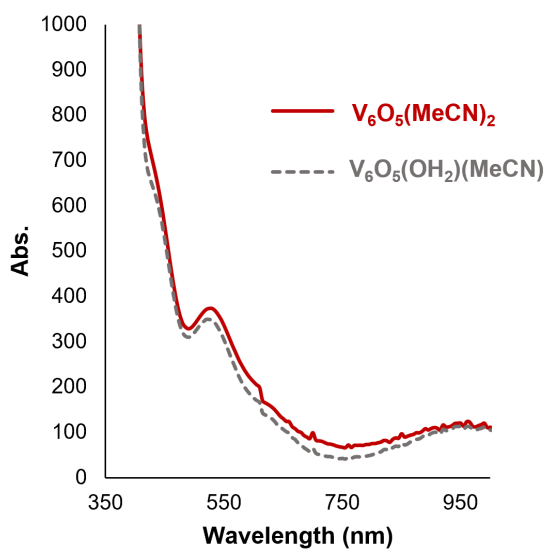

**Figure S13.** Electronic absorption spectrum of [ $V_6O_5(OH_2)(MeCN)$ ] $^0$ , grey dotted trace and [ $V_6O_5(MeCN)_2$ ] $^0$ , red trace, recorded at 21 °C in THF.

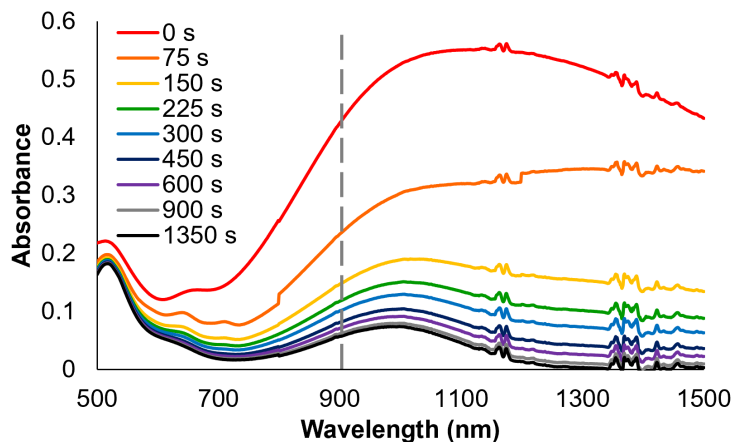

**Figure S14.** UV-Vis NIR of  $[\text{V}_6\text{O}_6(\text{MeCN})]^{0}$  (0.83 mM)+ 1 eq  $\text{H}_2\text{Phen}$  (0.83 mM) over time at 238 K in MeCN.

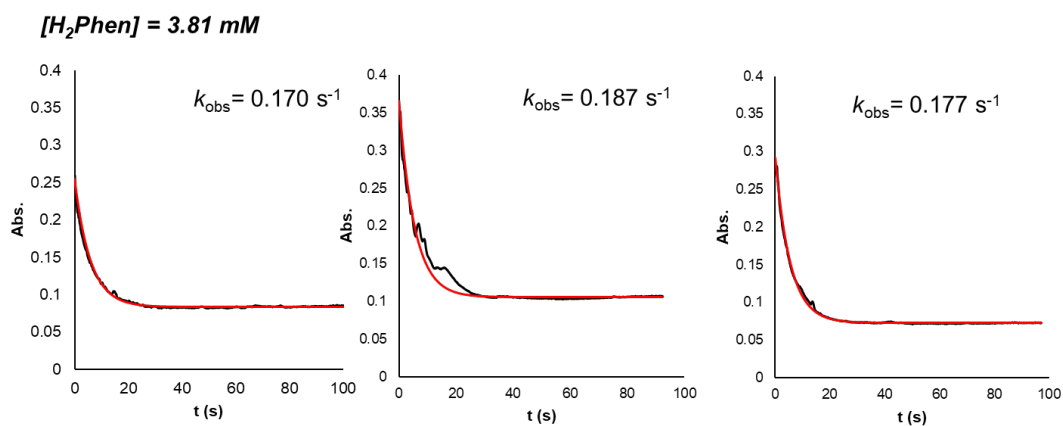

**Figure S15.** Plot of absorbance at 900 nm over time for reactions between  $[\text{V}_6\text{O}_6(\text{MeCN})]^{0}$  (0.75 mM) and excess  $\text{H}_2\text{Phen}$  (3.81 mM) under pseudo-first order conditions recorded in  $\text{CH}_3\text{CN}$  at 258 K, with raw data (black) and a fit curve (red). Concentration of  $\text{H}_2\text{Phen}$  for each reaction is noted, alongside the fit-derived  $k_{\text{obs}}$ . Triplicate data sets are reported.

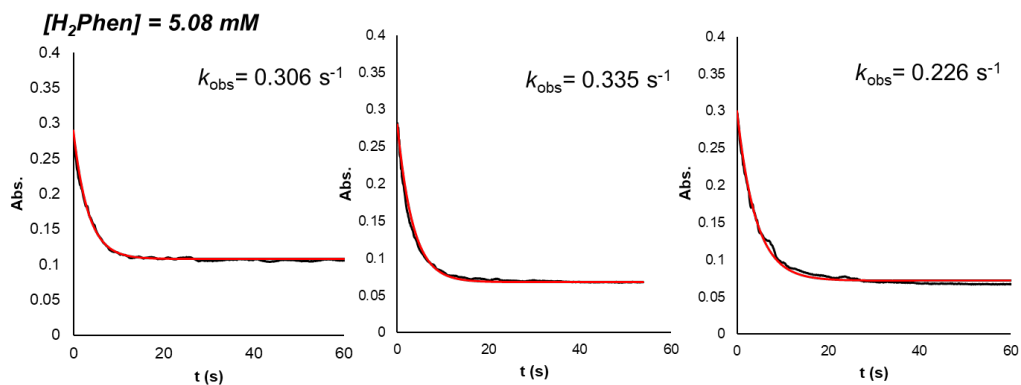

**Figure S16.** Plot of absorbance at 900 nm over time for reactions between  $[\text{V}_6\text{O}_6(\text{MeCN})]^{0}$  (0.75 mM) and excess  $\text{H}_2\text{Phen}$  (5.08 mM) under pseudo-first order conditions recorded in  $\text{CH}_3\text{CN}$  at 258 K, with raw data (black) and a fit curve (red). Concentration of  $\text{H}_2\text{Phen}$  for each reaction is noted, alongside the fit-derived  $k_{\text{obs}}$ . Triplicate data sets are reported.

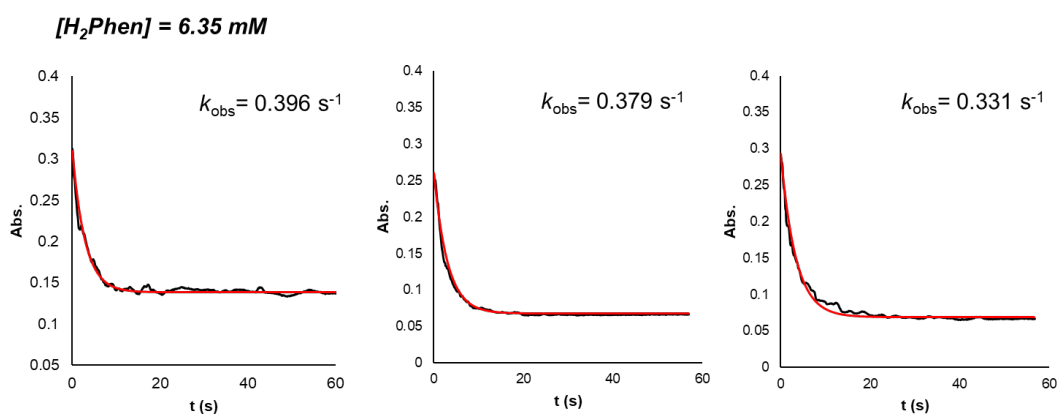

**Figure S17.** Plot of absorbance at 900 nm over time for reactions between  $[\text{V}_6\text{O}_6(\text{MeCN})]^{0}$  (0.75 mM) and excess  $\text{H}_2\text{Phen}$  (6.35 mM) under pseudo-first order conditions recorded in  $\text{CH}_3\text{CN}$  at 258 K, with raw data (black) and a fit curve (red). Concentration of  $\text{H}_2\text{Phen}$  for each reaction is noted, alongside the fit-derived  $k_{\text{obs}}$ . Triplicate data sets are reported.

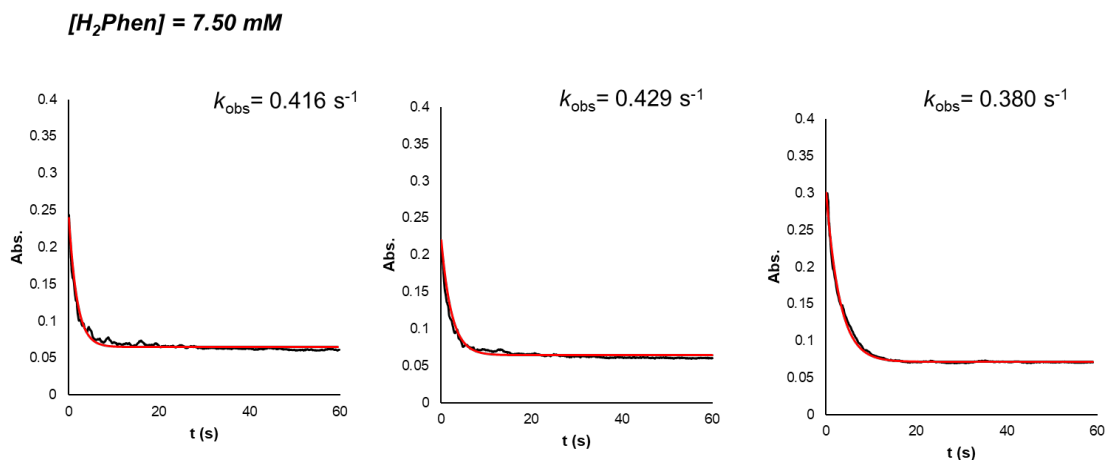

**Figure S18.** Plot of absorbance at 900 nm over time for reactions between  $[\text{V}_6\text{O}_6(\text{MeCN})]^{0}$  (0.75 mM) and excess  $\text{H}_2\text{Phen}$  (7.50 mM) under pseudo-first order conditions recorded in  $\text{CH}_3\text{CN}$  at 258 K, with raw data (black) and a fit curve (red). Concentration of  $\text{H}_2\text{Phen}$  for each reaction is noted, alongside the fit-derived  $k_{\text{obs}}$ . Triplicate data sets reported.

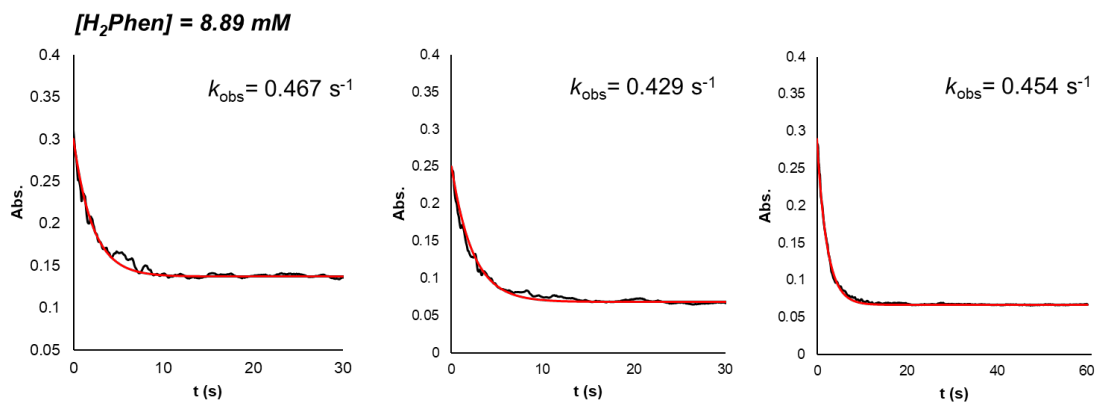

**Figure S19.** Plot of absorbance at 900 nm over time for reactions between  $[\text{V}_6\text{O}_6(\text{MeCN})]^{0}$  (0.75 mM) and excess  $\text{H}_2\text{Phen}$  (8.89 mM) under pseudo-first order conditions recorded in  $\text{CH}_3\text{CN}$  at 258 K, with raw data (black) and a fit curve (red). The fit-derived  $k_{\text{obs}}$  is noted. Triplicate data sets are reported.

**[D<sub>2</sub>Phen] = 3.75 mM**

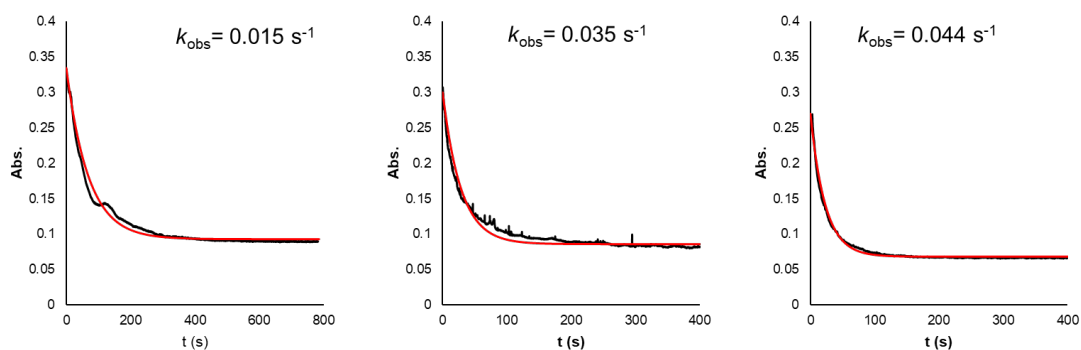

**Figure S20.** Plots of absorbance at 900 nm over time for reactions between  $[V_6O_6(MeCN)]^0$  (0.75 mM) and excess  $D_2Phen$  (3.75 mM) under pseudo-first order conditions recorded in  $CH_3CN$  at 258 K, with raw data (black) and a fit curve (red). The fit-derived  $k_{obs}$  is noted. Triplicate data sets are reported.

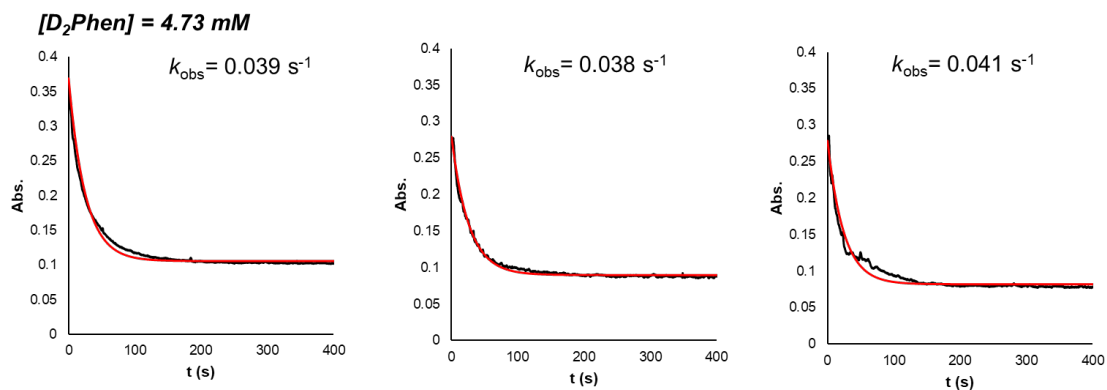

**Figure S21.** Plots of absorbance at 900 nm over time for reactions between  $[V_6O_6(MeCN)]^0$  (0.75 mM) and excess  $D_2Phen$  (4.73 mM) under pseudo-first order conditions recorded in  $CH_3CN$  at 258 K, with raw data (black) and a fit curve (red). The fit-derived  $k_{obs}$ . Triplicate data sets are reported.

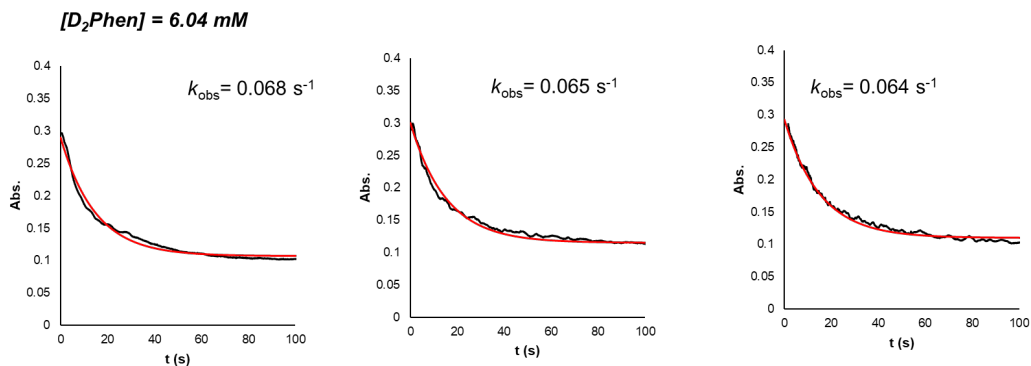

**Figure S22.** Plots of absorbance at 900 nm over time for reactions between  $[\text{V}_6\text{O}_6(\text{MeCN})]^{0}$  (0.75 mM) and excess  $\text{D}_2\text{Phen}$  (6.04 mM) under pseudo-first order conditions recorded in  $\text{CH}_3\text{CN}$  at 258 K, with raw data (black) and a fit curve (red). Concentration of  $\text{D}_2\text{Phen}$  for each reaction is noted, alongside the fit-derived  $k_{\text{obs}}$ .

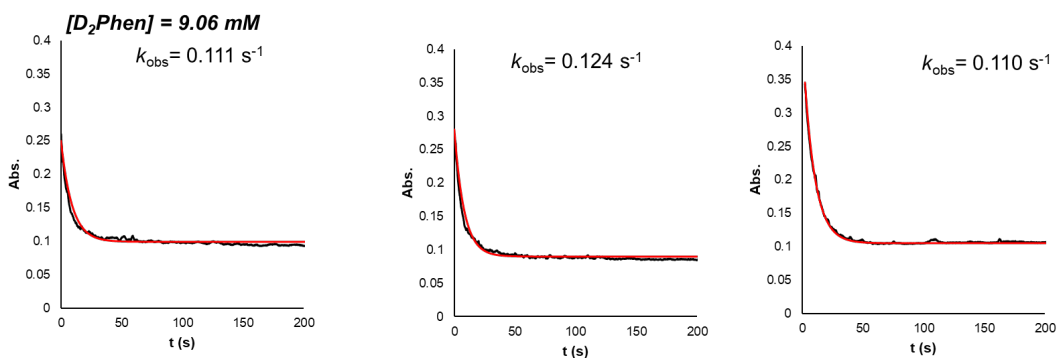

**Figure S23.** Plots of absorbance at 900 nm over time for reactions between  $[\text{V}_6\text{O}_6(\text{MeCN})]^{0}$  (0.75 mM) and excess  $\text{D}_2\text{Phen}$  (9.06 mM) under pseudo-first order conditions recorded in  $\text{CH}_3\text{CN}$  at 15 °C, with raw data (black) and a fit curve (red). The fit-derived  $k_{\text{obs}}$  is noted. Triplicate data sets are reported.

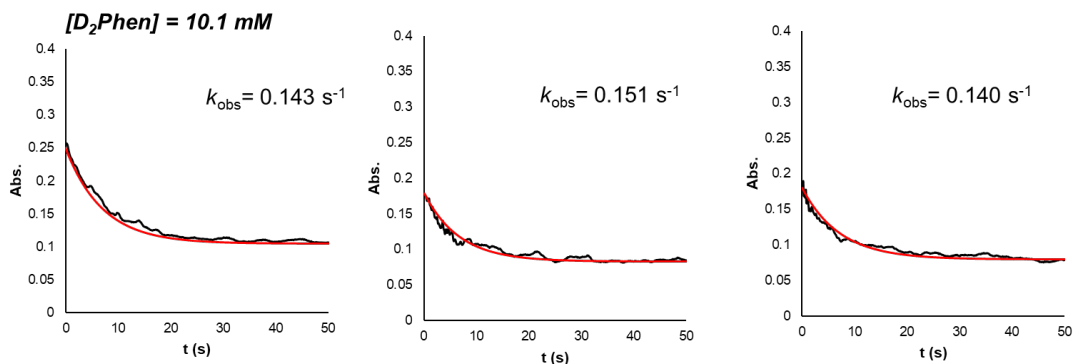

**Figure S24.** Plots of absorbance at 900 nm over time for reactions between  $[\text{V}_6\text{O}_6(\text{MeCN})]^{0}$  (0.75 mM) and excess  $\text{D}_2\text{Phen}$  (10.1 mM) under pseudo-first order conditions recorded in  $\text{CH}_3\text{CN}$  at 258 K, with raw data (red) and a fit curve (black). The fit-derived  $k_{\text{obs}}$  is noted. Triplicate data sets are reported.



**Temperature: 278 K**

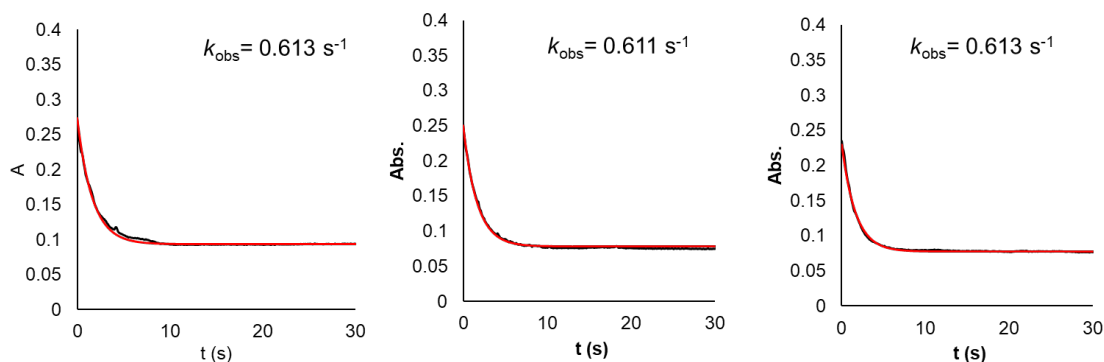

**Figure S25.** Plots of absorbance at 900 nm over time for reactions between  $[\text{V}_6\text{O}_6(\text{MeCN})]^0$  (0.75 mM) and  $\text{H}_2\text{Phen}$  (7.26 mM) recorded in  $\text{CH}_3\text{CN}$  at 278 K, with raw data (black) and a fit curve (red), providing  $k_{\text{obs}}$ . Triplicate data sets are reported.

**Temperature: 268 K**

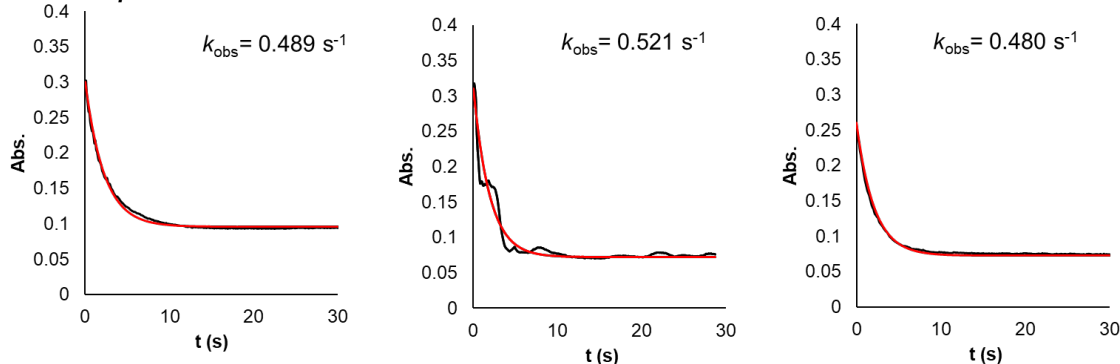

**Figure S26.** Plots of absorbance at 900 nm over time for reactions between  $[\text{V}_6\text{O}_6(\text{MeCN})]^0$  (0.75 mM) and  $\text{H}_2\text{Phen}$  (7.26 mM) recorded in  $\text{CH}_3\text{CN}$  at 268 K, with raw data (black) and a fit curve (red), providing  $k_{\text{obs}}$ . Triplicate data sets are reported.

**Temperature: 248 K**

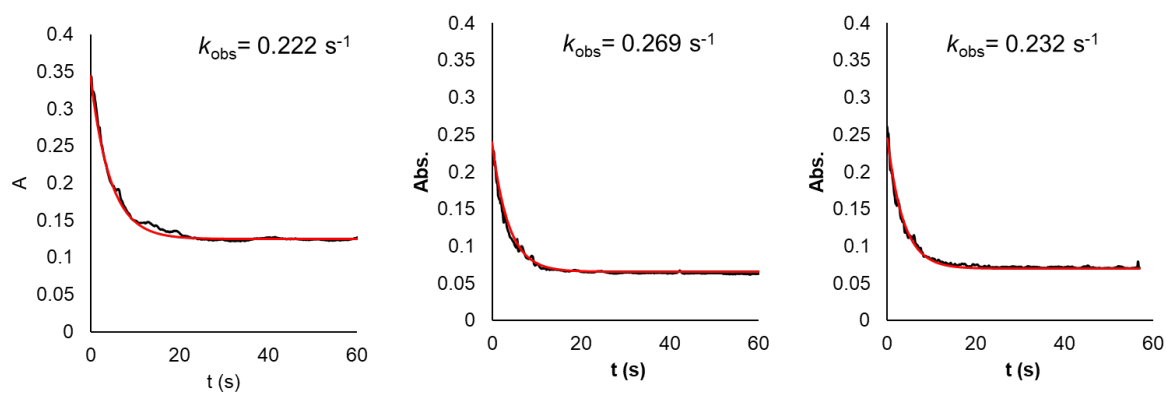

**Figure S27.** Plots of absorbance at 900 nm over time for reactions between  $[\text{V}_6\text{O}_6(\text{MeCN})]^0$  (0.75 mM) and  $\text{H}_2\text{Phen}$  (7.26 mM) recorded in  $\text{CH}_3\text{CN}$  at 248 K, with raw data (black) and a fit curve (red), providing  $k_{\text{obs}}$ . Triplicate data sets are reported.

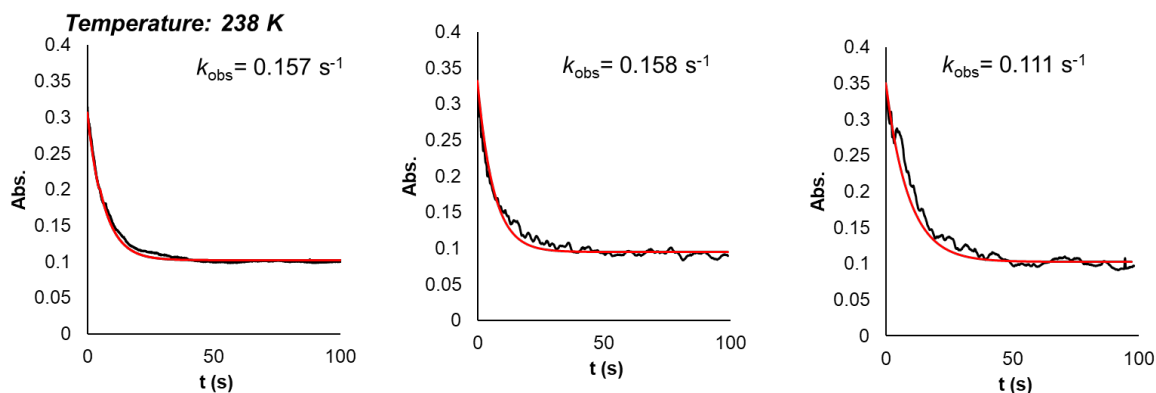

**Figure S28.** Plots of absorbance at 900 nm over time for reactions between  $[\text{V}_6\text{O}_6(\text{MeCN})]^0$  (0.75 mM) and  $\text{H}_2\text{Phen}$  (7.26 mM) recorded in  $\text{CH}_3\text{CN}$  at 238 K, with raw data (black) and a fit curve (red), providing  $k_{\text{obs}}$  and  $k_{\text{exp}}$ .

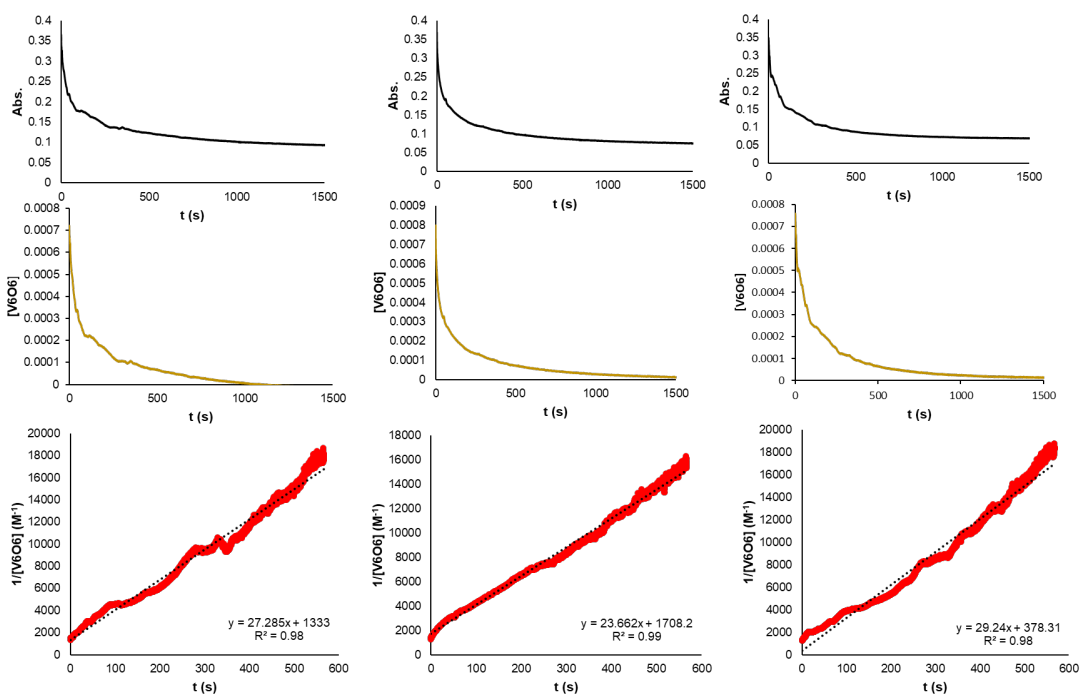

**Figure S29.**  $\text{V}_6\text{O}_6(\text{MeCN})$  (0.75 mM) + 1 eq  $\text{H}_2\text{Phen}$  (0.75 mM) in MeCN, over 30 minutes at 258 K. Exponential decay of  $\text{V}_6\text{O}_6(\text{MeCN})$  is monitored at 900 nm to least 3 half-lives, (top, black trace). Concentration of  $\text{V}_6\text{O}_6(\text{MeCN})$  converted from absorbance using the following equations:  $[\text{V}_6\text{O}_6]_t = [\text{V}_6\text{O}_6]_0 - [\text{V}_6\text{O}_5]_t$  and  $[\text{V}_6\text{O}_5]_t = (A_0 - A_t) / (\epsilon_{\text{V}_6\text{O}_6} - \epsilon_{\text{V}_6\text{O}_5})^2$ , where @ 900 nm  $\epsilon_{\text{V}_6\text{O}_6} = 415 \text{ M}^{-1} \text{ cm}^{-1}$ ,  $\epsilon_{\text{V}_6\text{O}_5} = 98 \text{ M}^{-1} \text{ cm}^{-1}$ , (middle, yellow trace). Plot of  $1/[\text{V}_6\text{O}_6(\text{MeCN})]$  vs  $t$  (bottom, red trace. Black dotted line indicates linear fit). Dividing the slope by the # of V=O and H-atoms transferred gets a second order  $k_{\text{PCET}} = 3.5 \pm 0.1 \text{ M}^{-1} \text{ s}^{-1}$ . Data sets reported in triplicate.

## References

1. B. E. Petel, A. A. Fertig, M. L. Maiola, W. W. Brennessel and E. M. Matson, *Inorganic Chemistry*, 2019, **58**, 10462-10471.
2. X. Lu, X. Li, Y. Lee, Y. Jang, M. S. Seo, S. Hong, K. Cho, S. Fukuzumi and W. Nam, *Journal of the American Chemical Society* 2020 **142**, 3891-3904.
